# Supplementary material
Source: MDPI journal article supplement (https://www.mdpi.com/2072-4292/14/8/1894)
Supplement: s1 [file s1]

## Supplementary Materials

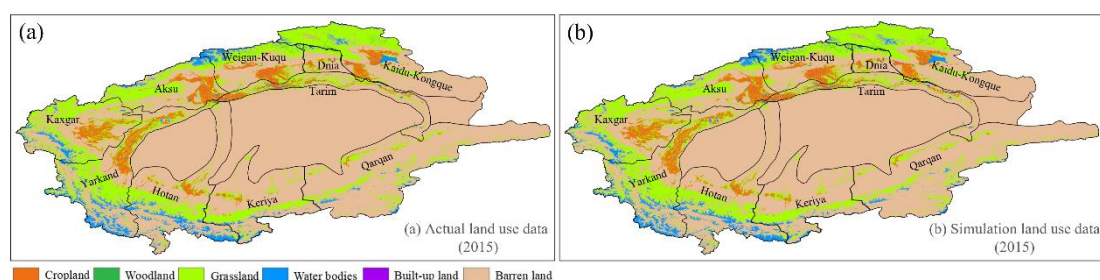

**Figure S1.** Map of simulated and actual land use change in the Tarim River Basin in 2015.

**Table S1.** Area changes by land type in the Tarim River Basin (km<sup>2</sup>).

| Land Type | Cropland | Woodland | Grassland | Water Bodies | Built-Up Land | Barren Land |
|-----------|----------|----------|-----------|--------------|---------------|-------------|
| 1990      | 33585.89 | 646.57   | 199806.96 | 34491.37     | 88.63         | 781380.57   |
| 2000      | 36258.51 | 1263.44  | 199860.36 | 33289.44     | 447.34        | 778880.91   |
| 2010      | 44830.48 | 1379.22  | 199508.18 | 38814.31     | 1683.77       | 763784.05   |
| 2019      | 52436.40 | 1661.93  | 198148.26 | 34109.29     | 2860.84       | 760783.29   |

**Table S2.** Type areas and errors of simulated and actual land classes in the Tarim River Basin in 2015.

| Land Type     | Simulation Data(km <sup>2</sup> ) | Actual Data(km <sup>2</sup> ) | Error (%) |
|---------------|-----------------------------------|-------------------------------|-----------|
| Cropland      | 51774.63                          | 51336.39                      | 0.85      |
| Woodland      | 1558.45                           | 1498.44                       | 4.01      |
| Grassland     | 198956.08                         | 200315.17                     | 0.68      |
| Built-up land | 2389.66                           | 2251.46                       | 6.14      |
| Water bodies  | 38238.67                          | 37684.31                      | 1.47      |
| Barren land   | 757082.50                         | 756914.23                     | 0.02      |
